# Supplementary material for: Skilful prediction of cod stocks in the North and Barents Sea a decade in advance
Source: Research Square preprint supplement (doi:10.21203/rs.3.rs-140686/v1), 2021-01-13
Supplement: Supplementary file 1 [file 630a860ae80a8345b1e863cd.pdf]

# Supplementary material for "Skilful prediction of cod stocks in the North and Barents Sea a decade in advance"

**Vimal Koul<sup>1,2,\*</sup>, Camilla Sguotti<sup>3</sup>, Marius Årthun<sup>4</sup>, Sebastian Brune<sup>2</sup>, André Düsterhus<sup>5</sup>, Bjarte Bogstad<sup>6</sup>, Geir Ottersen<sup>6,7</sup>, Johanna Baehr<sup>2</sup>, and Corinna Schrum<sup>1,2</sup>**

<sup>1</sup>Helmholtz Zentrum Geesthacht, Institute of Coastal Research, Geesthacht, Germany

<sup>2</sup>Institute of Oceanography, Center for Earth System Research and Sustainability, Universität Hamburg, Hamburg, Germany

<sup>3</sup>Institute for Marine Ecosystem and Fisheries Science, Center for Earth System Research and Sustainability, Universität Hamburg, Hamburg, Germany

<sup>4</sup>Geophysical Institute, University of Bergen and Bjerknes Centre for Climate Research, Bergen, Norway

<sup>5</sup>Irish Climate Analysis and Research UnitS (ICARUS), Department of Geography, Maynooth University, Maynooth, Ireland

<sup>6</sup>Institute of Marine Research, Bergen, Norway

<sup>7</sup>Centre for Ecological and Evolutionary Synthesis, Department of Biosciences, University of Oslo, Oslo, Norway

\*vimal.koul@uni-hamburg.de

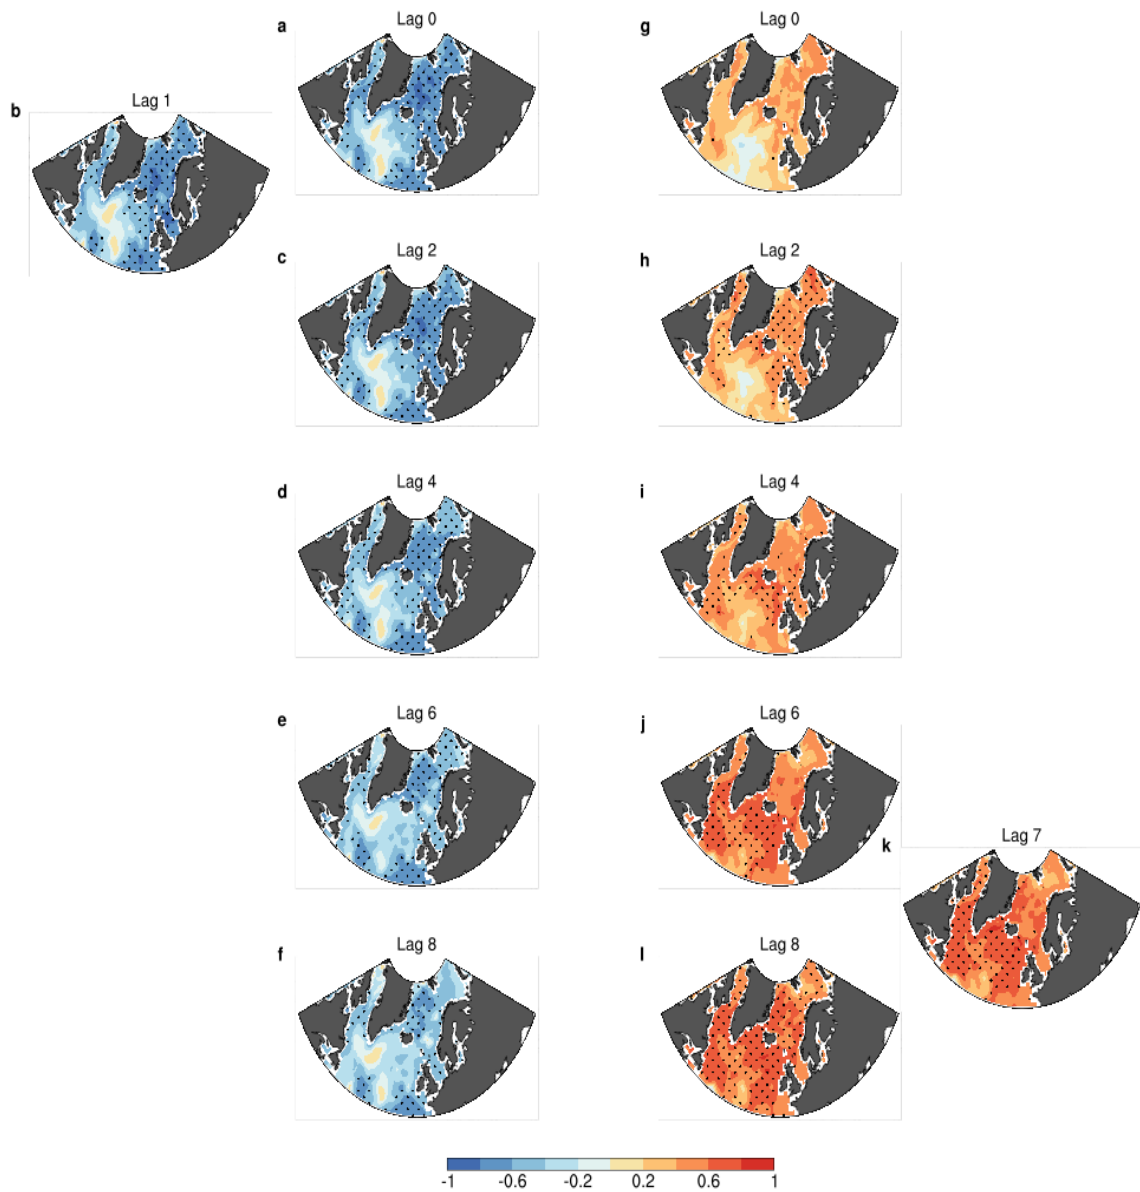

**Figure S1. Temperature-cod biomass correlation maps.** Correlation of total stock biomass and temperature at each grid point from the assimilation experiment at various lags (cod lags temperature) for (a-f) North Sea cod and (g-l) Northeast Arctic cod. The stippling indicates statistically significant correlation at 95% confidence. Linear trend was not removed prior to calculating correlation coefficients.

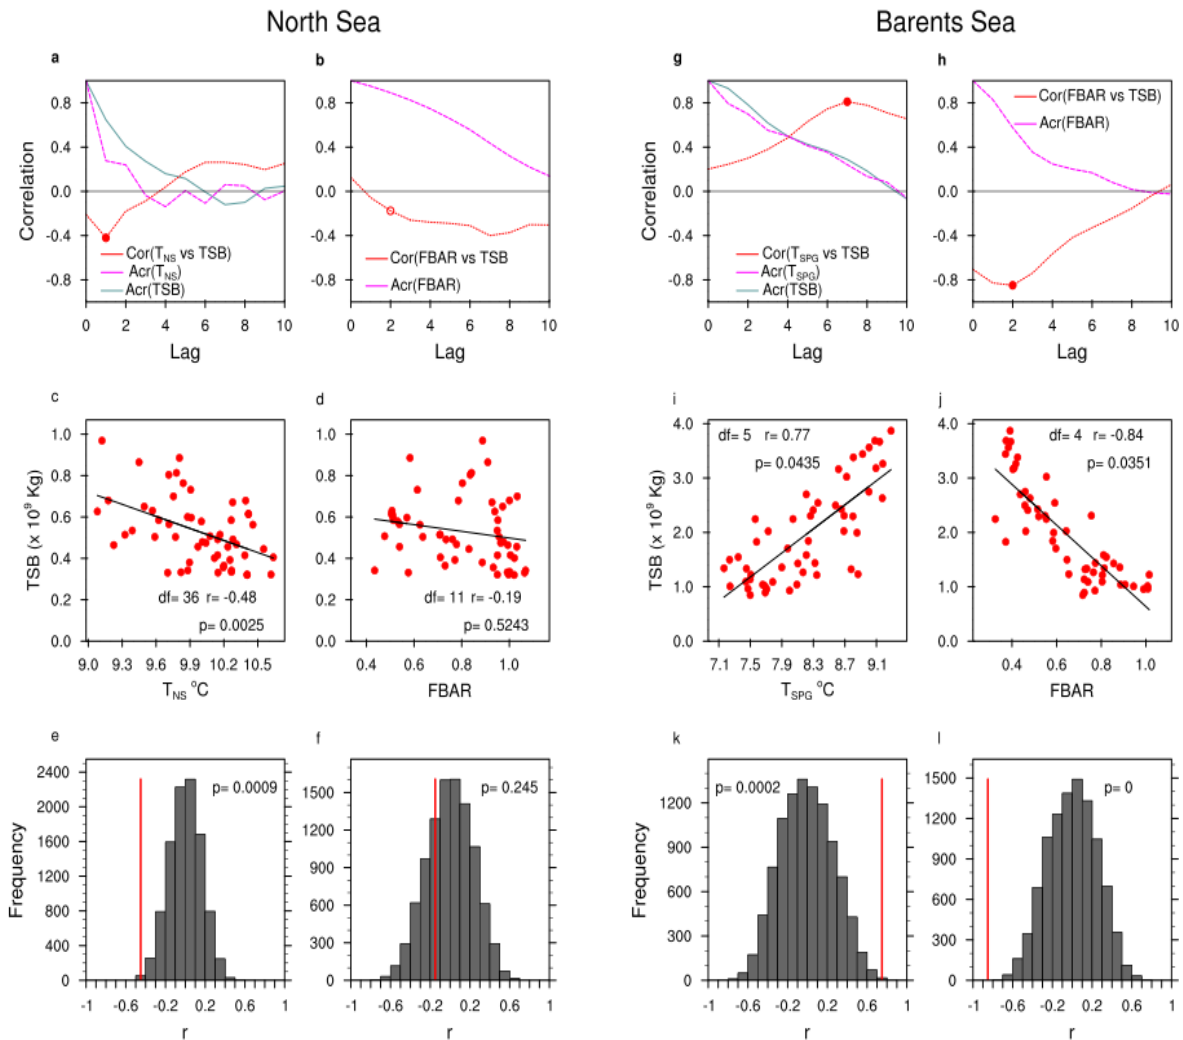

**Figure S2. Statistical relationships.** Auto correlation of cod-biomass, temperature and fishing mortality, and cross correlations between cod-biomass and two explanatory variables, temperature and fishing mortality for cod in **a, b** the North and **g, h** Barents Sea. For Barents Sea (i.e. Northeast Arctic cod), SPG-temperature is used as an explanatory variable. The red dots show the lag at which correlation is maximum, except for **b** where lag-1 is chosen based on **h** because none of the lag correlations in **b** are statistically significant. Scatter plot for **c** temperature versus cod-biomass and **d** fishing mortality versus cod-biomass for the North Sea, and **i, j** for the Barents Sea. Distribution of 10000 bootstrapped correlations between **e** temperature and cod-biomass and **f** fishing mortality and cod-biomass for the North Sea, and **k, l** for the Barents Sea from a random chance model. The vertical red line is the real correlation between respective variables. Linear trend was removed from each variable prior to calculating auto and cross correlations.

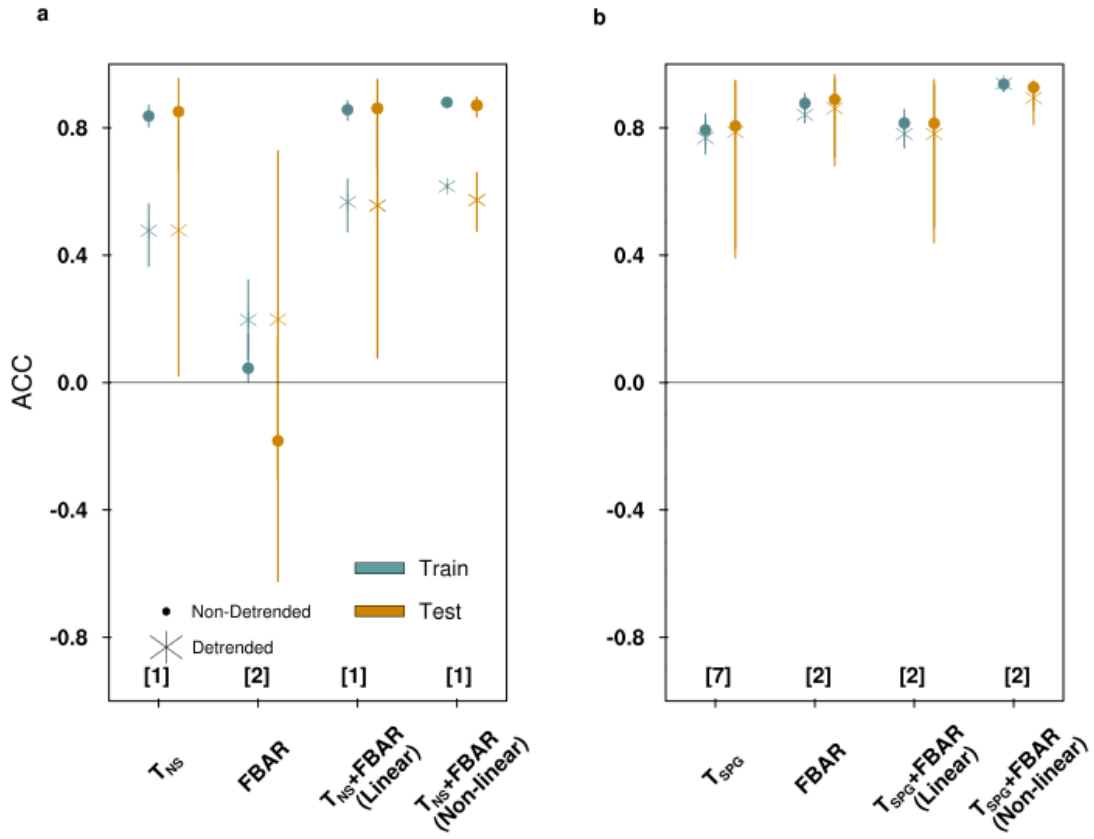

**Figure S3. Statistical cod prediction.** Same as Figure 2a,b in the main text but now with skill for detrended variables also shown.

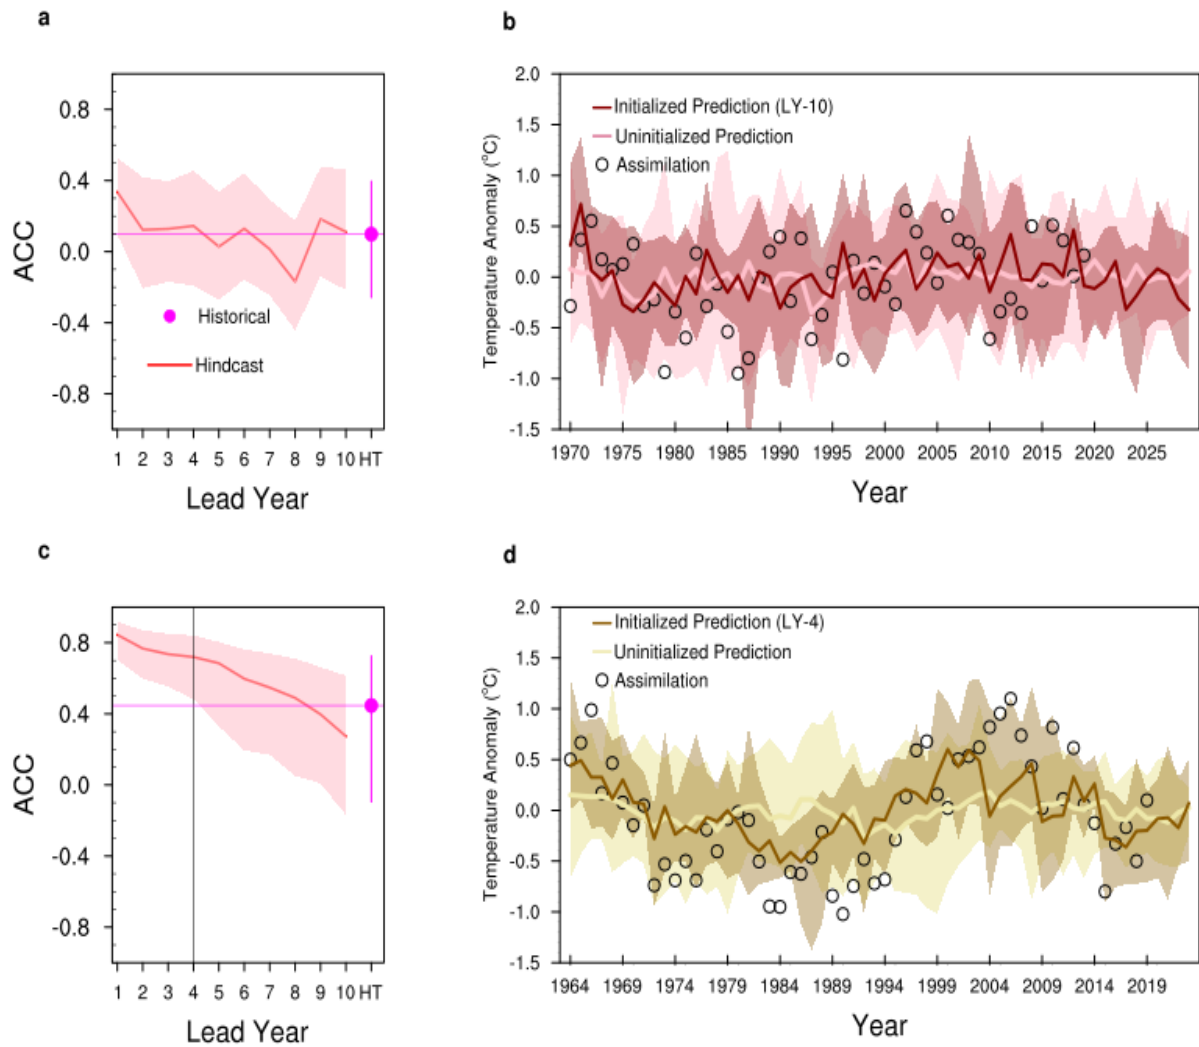

**Figure S4. Dynamical prediction of detrended temperature.** Retrospective dynamical prediction of North Sea and Subpolar gyre surface temperatures anomalies (with respect to 1970-2019 mean), same as Figure 3 in the main text but with linear trend removed. The vertical line in **c** shows the lead year beyond which the hindcast skill is not significantly different from the skill in historical simulation at 95% confidence level.
